# Supplementary material
Source: publisher figshare collection journal article supplement (https://karger.figshare.com/articles/dataset/_/5127763)
Supplement: Supplementary file 1 [file 000380842_sm_Figure.PDF › 000380842_sm_Figure.PDF]

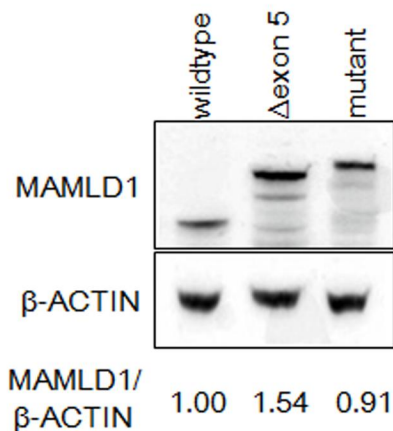

### Supplemental Figure 1.

The amount of each plasmid was adjusted such that all MAMLD1 proteins showed similar expression levels relative to that of  $\beta$ -ACTIN. The signal for MAMLD1 proteins was probed with an anti-myc tag-antibody.
