# Supplementary material
Source: publisher figshare collection journal article supplement (https://karger.figshare.com/articles/dataset/_/5127763)
Supplement: Supplementary file 2 [file 000380842_sm_Table.PDF › 000380842_sm_Table.PDF]

Supplemental Table 1. Primers used in the present study.

|                   | Forward                      | Reverse                     |
|-------------------|------------------------------|-----------------------------|
| Sequence analysis |                              |                             |
| exon 3a           | TGTGTGTGTGTGTGTGTCACC        | GGCTTCGTCCCCAGTATCTT        |
| exon 3b           | AGAGGCCTTGCCTTGAAGAT         | CTCTTGGACTGTGCCATTGA        |
| exon 3c           | TTCCAGCAAGGAGTTTGCTT         | GCAAGAATGGAGCTCTGAGG        |
| exon 3d           | CCTTGTCGGGTAGCACTCTC         | CAGGTAGTGGAGCAGGGAAG        |
| exon 3e           | AGCCTCACTCCCACCAGTAA         | TAGCCTGGATTTACCCTCCA        |
| exon 4            | CGGTGTGGAGATAGGCAAAG         | ATGATTTGCATGACCCCAAT        |
| exon 5            | AGAACCATTTTGTGGCCAAG         | CTGTGTTCTCCCAACAACC         |
| exon 6            | GTGGAATTTTGCTCGAGAGG         | TGAATTCTCACCCCACTTCC        |
| RT-PCR            |                              |                             |
| exons 3 and 6     | TCAGTGGCCTCAGATTCCAT         | TCAGGGGTCATTGCCATAAG        |
| $\Delta$ exon 4   | <u>CTCTGCCCAGACAGACTCAT</u>  | <u>TCAGGGGTCATTGCCATAAG</u> |
| $\Delta$ exon 5   | TCAGTGGCCTCAGATTCCAT         | TCTGTTCCCTCTTGAATGTTAGACG   |
| <i>GAPDH</i>      | GCACCGTCAAGGCTGAGAAC         | TGGTGAAGACGCCAGTGGA         |
| cDNA cloning      |                              |                             |
|                   | GTCGACGGCTGATGGGGGCTACCCTAAT | CGGTACCGGGCATCCTGCTCAGATTTA |
| Mutagenesis       |                              |                             |
| g.IVS4–2A>G       | CTAACATTACAAAGCCTGCAAGCTTG   | GGCTTTGTAATGTTAGACGGTGACAC  |
| $\Delta$ exon 5   | TAACATTCAAGAGGAACAGAGATCA    | TCCTCTTGAATGTTAGACGGTGACAC  |
